# Supplementary material for: Crystallization induced layer-to-layer transitions in symmetric PEO-b-PLLA block copolymer with synchrotron simultaneous SAXS/WAXS investigations
Source: Royal Society of Chemistry journal article supplement (doi:10.1039/c4ra09284h), 2014-01-01
Supplement: c4ra09284h1.pdf [file c4ra09284h1.pdf]

## Supporting Information

### Crystallization Induced Layer-to-Layer Transitions in Symmetric PEO-b- PLLA Block Copolymer with Synchrotron Simultaneous SAXS/WAXS Investigations

Feifei Xue<sup>1</sup>, Xuesi Chen<sup>2</sup>, Lijia An<sup>2</sup>, Sergio Funari<sup>3</sup>, Shichun Jiang<sup>1\*</sup>

<sup>1)</sup> School of Materials Science and Engineering, Tianjin University, Tianjin, 300072,  
P. R. China

<sup>2)</sup> State of Key Laboratory of Polymer Physics and Chemistry, Changchun Institute of  
Applied Chemistry, Chinese Academy of Sciences, Changchun, 130022, P. R. China

<sup>3)</sup> HASYLAB at DESY, Notkestraße 85, D-22603 Hamburg, Germany

---

\* Corresponding author, [scjiang@tju.edu.cn](mailto:scjiang@tju.edu.cn)

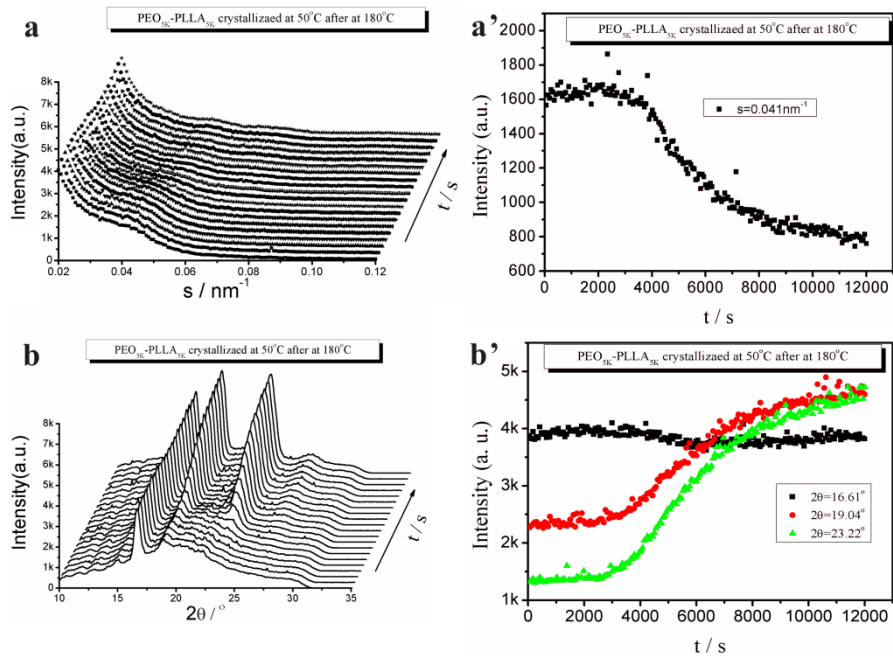

**Figure SI-1.** Simultaneous profiles and the integrated intensity  $I_{\text{int}}$  as a function of time obtained from SAXS (a, a') and WAXS (b, b') measurements during isothermal crystallization of PEO-b-PLLA at 50 °C after at 180 °C.

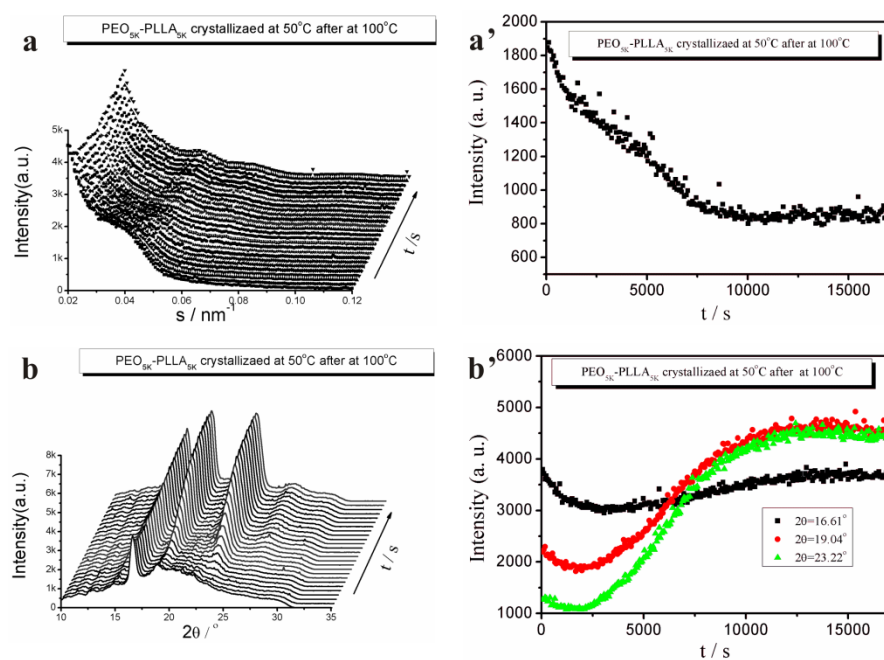

**Figure SI-2.** Simultaneous profiles and the integrated intensity  $I_{\text{int}}$  as a function of time obtained from SAXS (a, a') and WAXS (b, b') measurements during isothermal crystallization of PEO-b-PLLA at 50 °C after at 100 °C.
